# Supplementary material for: Bucket effect on high-performance Li–O2 batteries based on P-doped 3D NiO microspheres with conformal growth of discharge products
Source: Royal Society of Chemistry journal article supplement (doi:10.1039/d2ta07061h), 2022-01-01
Supplement: d2ta07061h1.pdf [file d2ta07061h1.pdf]

## Supporting Information

### **Bucket Effect on High-performance Li-O<sub>2</sub> Batteries Based on P-doped 3D NiO**

### **Microspheres with Conformal Growth of Discharge Products**

Yuxin Long,<sup>#a</sup> Zidong Zhang,<sup>#a</sup> Lanling Zhao,<sup>b</sup> Qingxi Zeng,<sup>c</sup> Qiang Li,<sup>c</sup> Jun Wang,<sup>\*ac</sup>  
Deyuan Li,<sup>a</sup> Qing Xia,<sup>a</sup> Yao Liu,<sup>\*a</sup> Xue Han,<sup>a</sup> Zhaorui Zhou,<sup>a</sup> Yebing Li,<sup>a</sup> Yiming  
Zhang,<sup>a</sup> Shulei Chou<sup>\*d</sup>

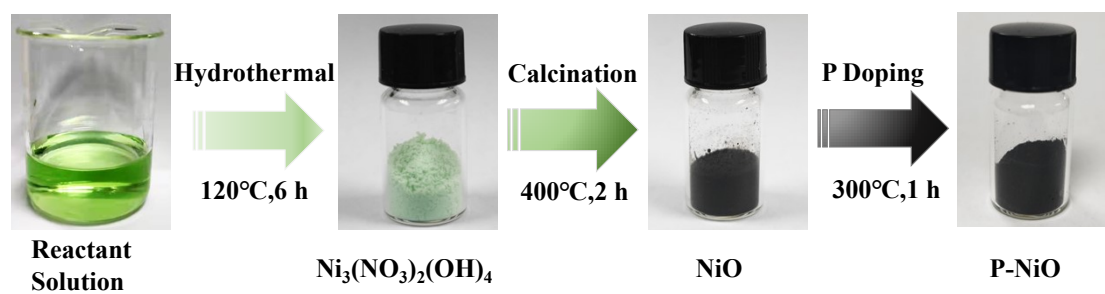

**Fig. S1.** Digital photo illustration of the synthesis path.

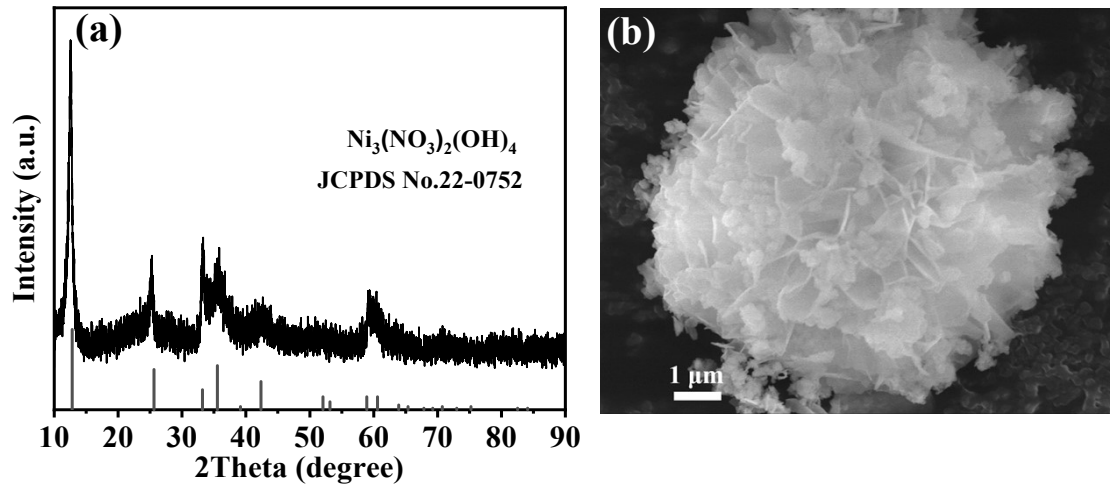

**Fig. S2.** (a) XRD pattern and (b) SEM image of NiO precursor.

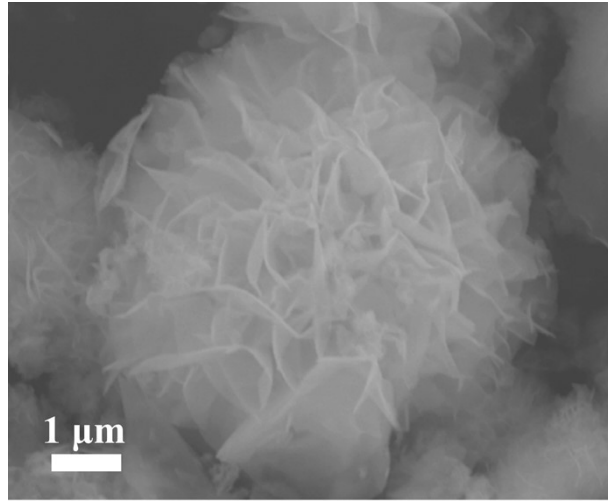

**Fig. S3.** SEM image of NiO.

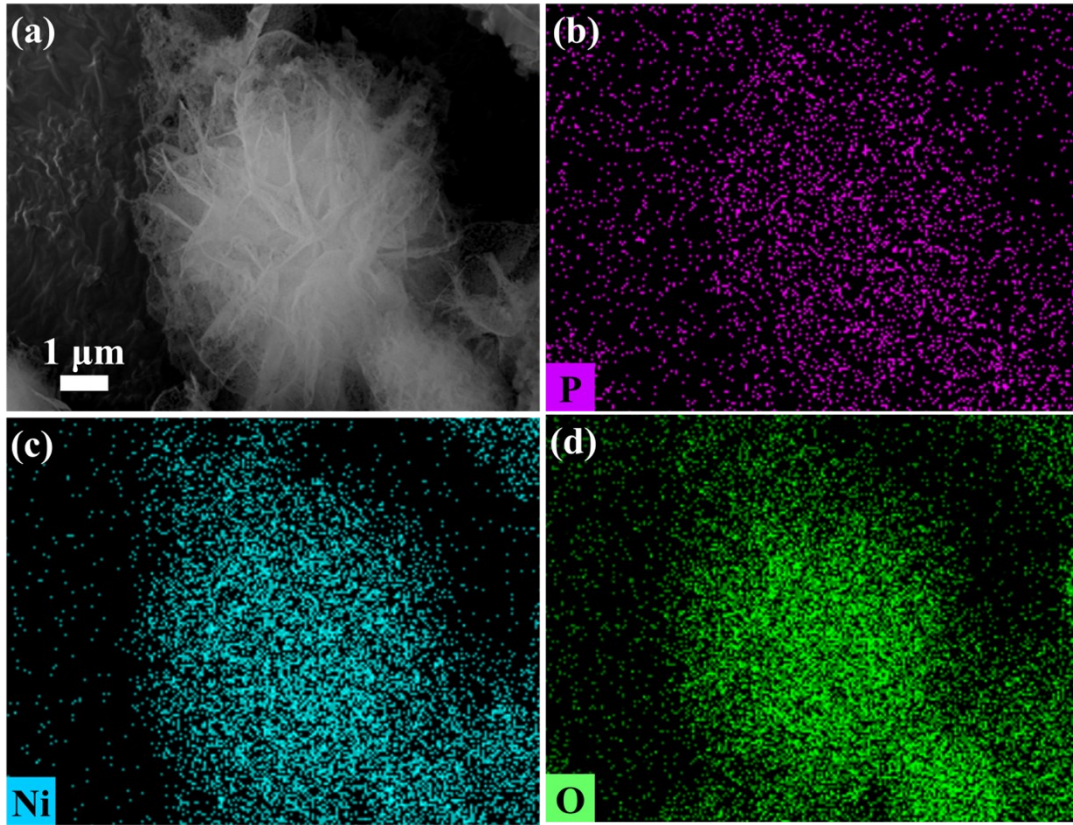

**Fig. S4.** SEM image with EDS patterns of 0.5P-NiO.

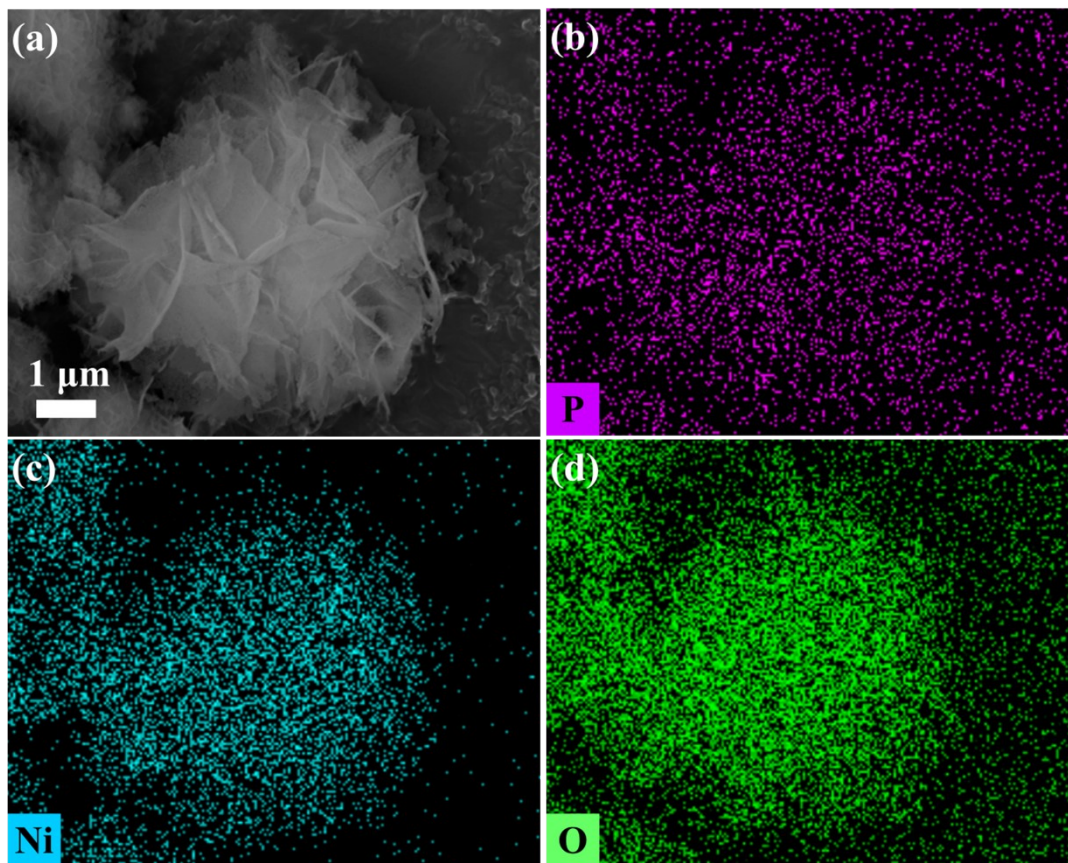

**Fig. S5.** SEM image with EDS patterns of 1P-NiO.

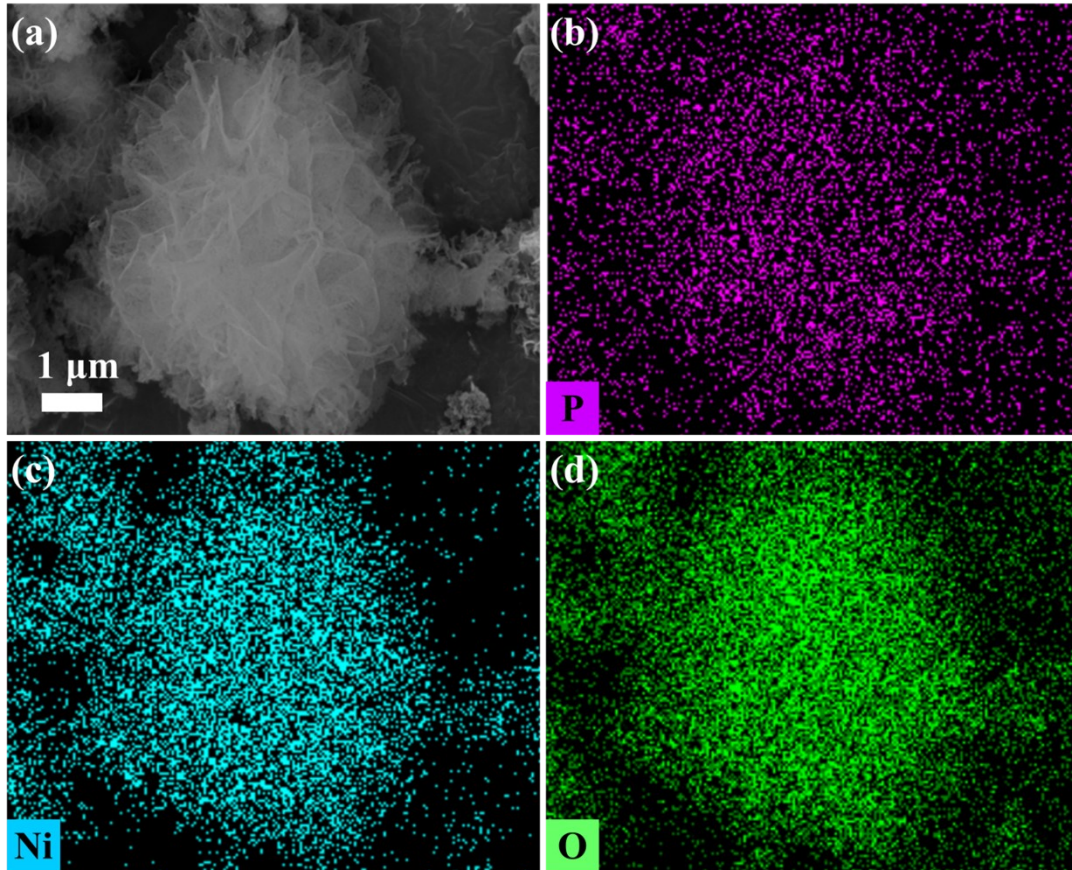

**Fig. S6.** SEM image with EDS patterns of 1.5P-NiO.

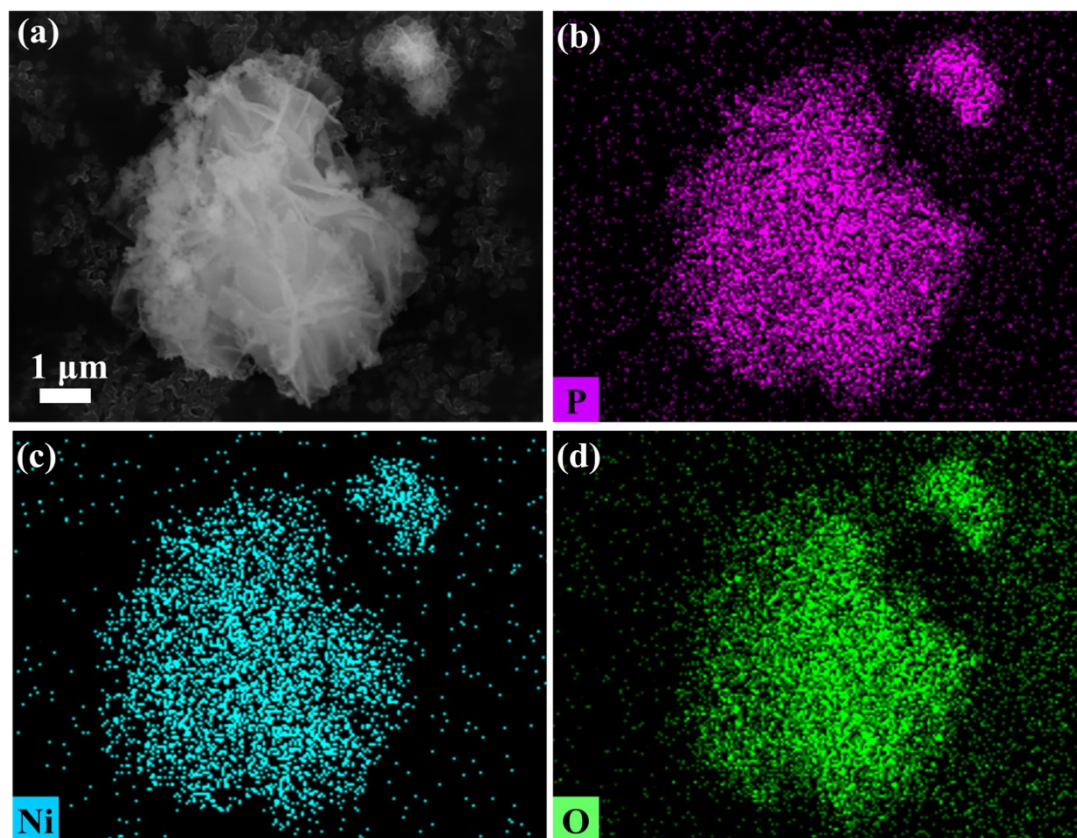

**Fig. S7.** SEM image with EDS patterns of 3P-NiO.



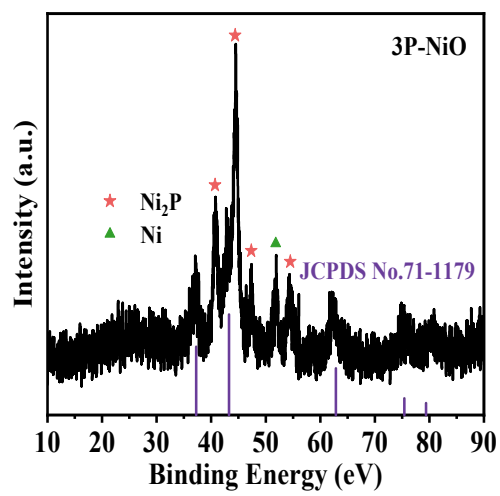

**Fig. S8.** XRD pattern of 3P-NiO.

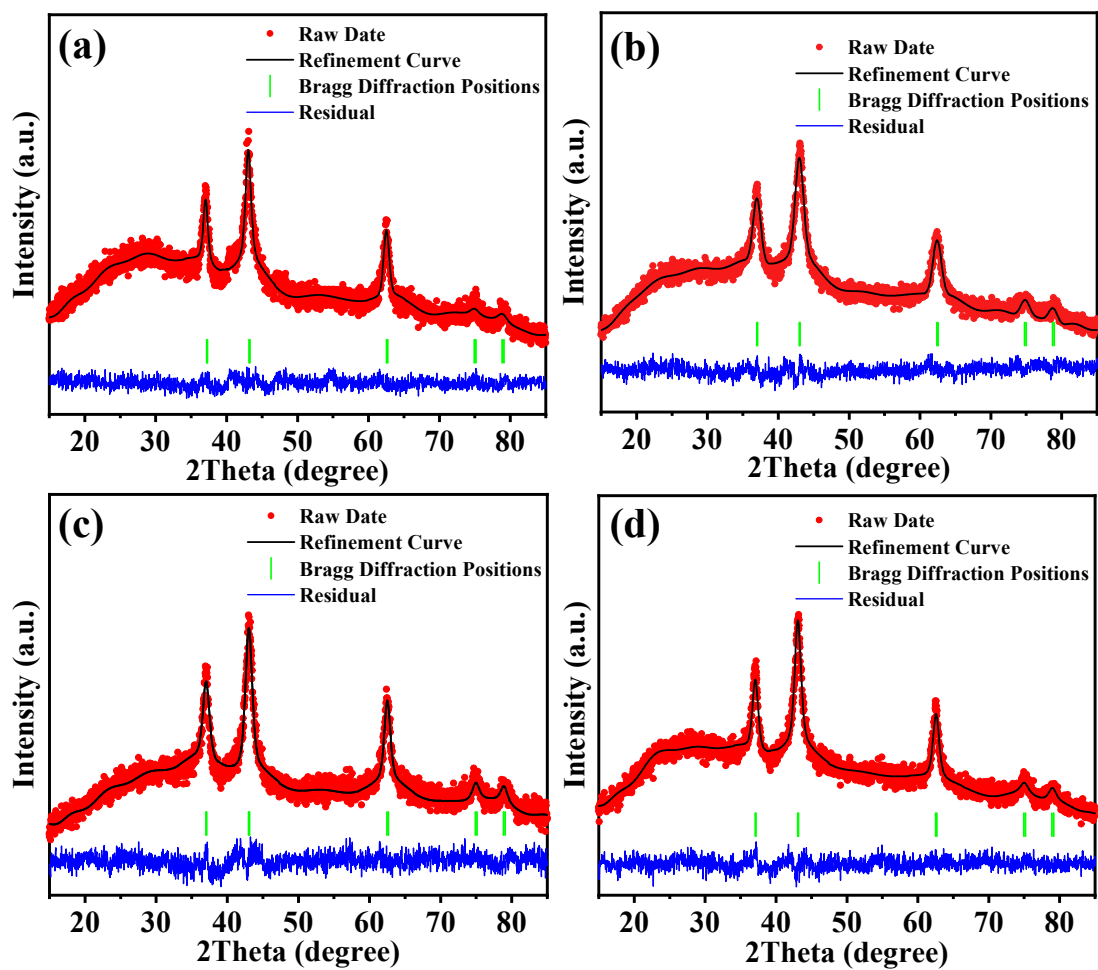

**Fig. S9.** Rietveld refined XRD patterns of (a) NiO, (b) 0.5P-NiO, (c) 1P-NiO and (d) 1.5P-NiO.

**Table S1.** Lattice parameters, cell volume, agreement factor, atomic coordinates, atomic occupation, bond lengths and bond angles of NiO with a standard cubic (Fm-3m) symmetry.

| <b>a (Å)</b> | <b>b (Å)</b> | <b>c (Å)</b> | <b>V (Å<sup>3</sup>)</b> | <b><math>\chi^2</math></b> | <b>Rp</b> | <b>Rwp</b> |
|--------------|--------------|--------------|--------------------------|----------------------------|-----------|------------|
| 4.229880     | 4.229880     | 4.229880     | 75.68                    | 6.441                      | 1.79      | 2.25       |

| <b>Atom</b> | <b>Wyckoff Position</b> | <b>X</b> | <b>Y</b> | <b>Z</b> | <b>Occupancy</b> |
|-------------|-------------------------|----------|----------|----------|------------------|
| Ni          | 4b                      | 0.500000 | 0.500000 | 0.500000 | 1.0000           |
| O           | 4a                      | 0.000000 | 0.000000 | 0.000000 | 1.0000           |

| <b>Bonding Atom</b> | <b>Bond Length (Å)</b> | <b>Bonding Atom</b> | <b>Bond Angles (°)</b> |
|---------------------|------------------------|---------------------|------------------------|
| Ni-O                | 2.1149(5)              | O-Ni-O              | 180.00(0)              |
|                     |                        | O-Ni-O              | 90.00(0)               |
|                     |                        | Ni-O-Ni             | 180.00(0)              |
|                     |                        | Ni-O-Ni             | 90.00(0)               |

**Table S2.** Lattice parameters, cell volume, agreement factor, atomic coordinates, atomic occupation, bond lengths and bond angles of 0.5P-NiO with a standard cubic (Fm-3m) symmetry.

| <b>a (Å)</b> | <b>b (Å)</b> | <b>c (Å)</b> | <b>V (Å<sup>3</sup>)</b> | <b><math>\chi^2</math></b> | <b>Rp</b> | <b>Rwp</b> |
|--------------|--------------|--------------|--------------------------|----------------------------|-----------|------------|
| 4.20746      | 4.20746      | 4.20746      | 74.48                    | 9.38                       | 2.37      | 3.23       |

| <b>Atom</b> | <b>Wyckoff Position</b> | <b>X</b> | <b>Y</b> | <b>Z</b> | <b>Occupancy</b> |
|-------------|-------------------------|----------|----------|----------|------------------|
| Ni          | 4b                      | 0.500000 | 0.500000 | 0.500000 | 1.0000           |
| O           | 4a                      | 0.000000 | 0.000000 | 0.000000 | 0.9786           |
| P           | 4a                      | 0.000000 | 0.000000 | 0.000000 | 0.0214           |

| <b>Bonding Atom</b> | <b>Bond Length (Å)</b> | <b>Bonding Atom</b> | <b>Bond Angles (°)</b> |
|---------------------|------------------------|---------------------|------------------------|
| Ni-O                | 2.10372(30)            | O(P)-Ni-O(P)        | 180.00(0)              |
| Ni-P                | 2.10372(30)            | O(P)-Ni-O(P)        | 90.00(0)               |
|                     |                        | Ni-O(P)-Ni          | 180.00(0)              |
|                     |                        | Ni-O(P)-Ni          | 90.00(0)               |
|                     |                        | O-Ni-P              | 0.00(0)                |

**Table S3.** Lattice parameters, cell volume, agreement factor, atomic coordinates, atomic occupation, bond lengths and bond angles of 1P-NiO with a standard cubic (Fm-3m) symmetry.

| <b>a (Å)</b> | <b>b (Å)</b> | <b>c (Å)</b> | <b>V (Å<sup>3</sup>)</b> | <b><math>\chi^2</math></b> | <b>Rp</b> | <b>Rwp</b> |
|--------------|--------------|--------------|--------------------------|----------------------------|-----------|------------|
| 4.201662     | 4.201662     | 4.201662     | 74.18                    | 7.32                       | 2.43      | 3.07       |

| <b>Atom</b> | <b>Wyckoff Position</b> | <b>X</b> | <b>Y</b> | <b>Z</b> | <b>Occupancy</b> |
|-------------|-------------------------|----------|----------|----------|------------------|
| Ni          | 4b                      | 0.500000 | 0.500000 | 0.500000 | 1.0000           |
| O           | 4a                      | 0.000000 | 0.000000 | 0.000000 | 0.9616           |
| P           | 4a                      | 0.000000 | 0.000000 | 0.000000 | 0.0384           |

| <b>Bonding Atom</b> | <b>Bond Length (Å)</b> | <b>Bonding Atom</b> | <b>Bond Angles (°)</b> |
|---------------------|------------------------|---------------------|------------------------|
| Ni-O                | 2.10083(25)            | O(P)-Ni-O(P)        | 180.00(0)              |
| Ni-P                | 2.10083(25)            | O(P)-Ni-O(P)        | 90.00(0)               |
|                     |                        | Ni-O(P)-Ni          | 180.00(0)              |
|                     |                        | Ni-O(P)-Ni          | 90.00(0)               |
|                     |                        | O-Ni-P              | 0.00(0)                |

**Table S4.** Lattice parameters, cell volume, agreement factor, atomic coordinates, atomic occupation, bond lengths and bond angles of 1.5P-NiO with a standard cubic (Fm-3m) symmetry.

| <b>a (Å)</b> | <b>b (Å)</b> | <b>c (Å)</b> | <b>V (Å<sup>3</sup>)</b> | <b><math>\chi^2</math></b> | <b>Rp</b> | <b>Rwp</b> |
|--------------|--------------|--------------|--------------------------|----------------------------|-----------|------------|
| 4.200460     | 4.200460     | 4.200460     | 74.11                    | 9.31                       | 2.65      | 3.38       |

| <b>Atom</b> | <b>Wyckoff Position</b> | <b>X</b> | <b>Y</b> | <b>Z</b> | <b>Occupancy</b> |
|-------------|-------------------------|----------|----------|----------|------------------|
| Ni          | 4b                      | 0.500000 | 0.500000 | 0.500000 | 1.0000           |
| O           | 4a                      | 0.000000 | 0.000000 | 0.000000 | 0.9080           |
| P           | 4a                      | 0.000000 | 0.000000 | 0.000000 | 0.0920           |

| <b>Bonding Atom</b> | <b>Bond Length (Å)</b> | <b>Bonding Atom</b> | <b>Bond Angles (°)</b> |
|---------------------|------------------------|---------------------|------------------------|
| Ni-O                | 2.10023(28)            | O(P)-Ni-O(P)        | 180.00(0)              |
| Ni-P                | 2.10023(28)            | O(P)-Ni-O(P)        | 90.00(0)               |
|                     |                        | Ni-O(P)-Ni          | 180.00(0)              |
|                     |                        | Ni-O(P)-Ni          | 90.00(0)               |
|                     |                        | O-Ni-P              | 0.00(0)                |

**Table S5.** Lattice parameters, cell volume, agreement factor, atomic coordinates, atomic occupation, bond lengths and bond angles of 2P-NiO with a standard cubic (Fm-3m) symmetry.

| <b>a (Å)</b> | <b>b (Å)</b> | <b>c (Å)</b> | <b>V (Å<sup>3</sup>)</b> | <b><math>\chi^2</math></b> | <b>Rp</b> | <b>Rwp</b> |
|--------------|--------------|--------------|--------------------------|----------------------------|-----------|------------|
| 4.211271     | 4.211271     | 4.211271     | 74.68                    | 8.705                      | 2.06      | 2.64       |

| <b>Atom</b> | <b>Wyckoff Position</b> | <b>X</b> | <b>Y</b> | <b>Z</b> | <b>Occupancy</b> |
|-------------|-------------------------|----------|----------|----------|------------------|
| Ni          | 4b                      | 0.500000 | 0.500000 | 0.500000 | 1.0000           |
| O           | 4a                      | 0.000000 | 0.000000 | 0.000000 | 0.8875           |
| P           | 4a                      | 0.000000 | 0.000000 | 0.000000 | 0.1125           |

| <b>Bonding Atom</b> | <b>Bond Length (Å)</b> | <b>Bonding Atom</b> | <b>Bond Angles (°)</b> |
|---------------------|------------------------|---------------------|------------------------|
| Ni-O                | 2.10564(26)            | O(P)-Ni-O(P)        | 180.00(0)              |
| Ni-P                | 2.10564(26)            | O(P)-Ni-O(P)        | 90.00(0)               |
|                     |                        | Ni-O(P)-Ni          | 180.00(0)              |
|                     |                        | Ni-O(P)-Ni          | 90.00(0)               |
|                     |                        | O-Ni-P              | 0.00(0)                |

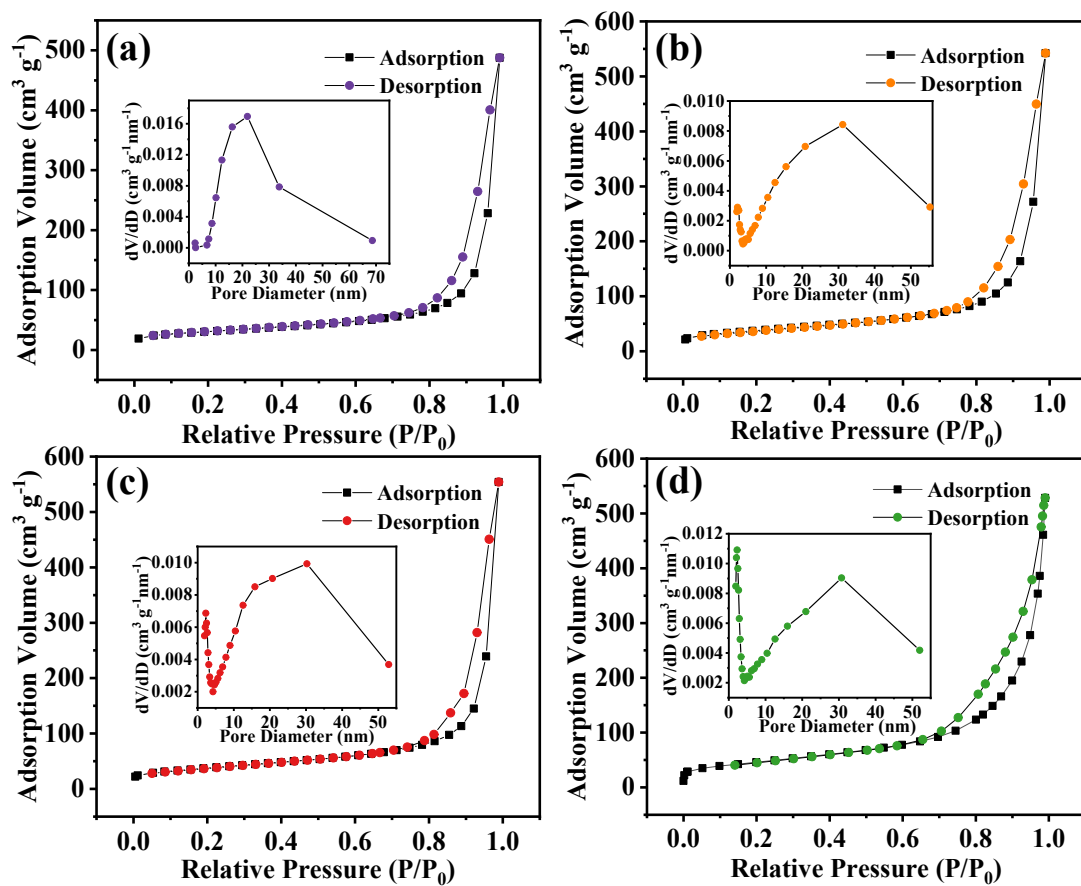

**Fig. S10.** Nitrogen adsorption/desorption isotherms and pore-size distributions (inset) of (a) NiO, (b) 0.5P-NiO, (c) 1P-NiO and (d) 1.5P-NiO.



**Table S6.** BET and BJH results of NiO and P-NiO samples.

| <b>Sample</b> | <b>BET Surface Area<br/>(m<sup>2</sup> g<sup>-1</sup>)</b> | <b>Pore Volume<br/>(cm<sup>3</sup> g<sup>-1</sup>)</b> |
|---------------|------------------------------------------------------------|--------------------------------------------------------|
| NiO           | 108.15                                                     | 0.753198                                               |
| 0.5P-NiO      | 134.14                                                     | 0.838874                                               |
| 1P-NiO        | 134.63                                                     | 0.857078                                               |
| 1.5P-NiO      | 165.09                                                     | 0.817038                                               |
| 2P-NiO        | 171.60                                                     | 0.952739                                               |

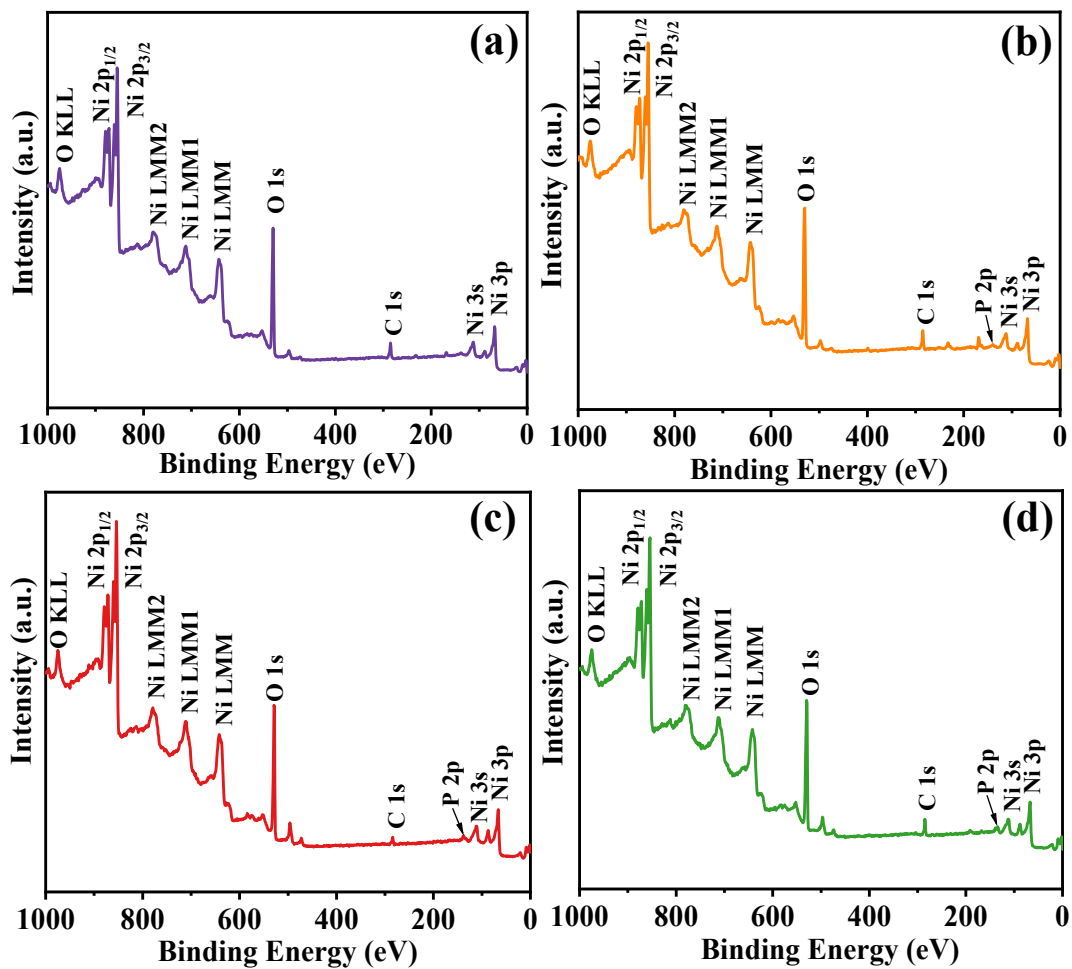

Fig. S11. XPS survey spectra of (a) NiO, (b) 0.5P-NiO, (c) 1P-NiO and (d) 1.5P-NiO.

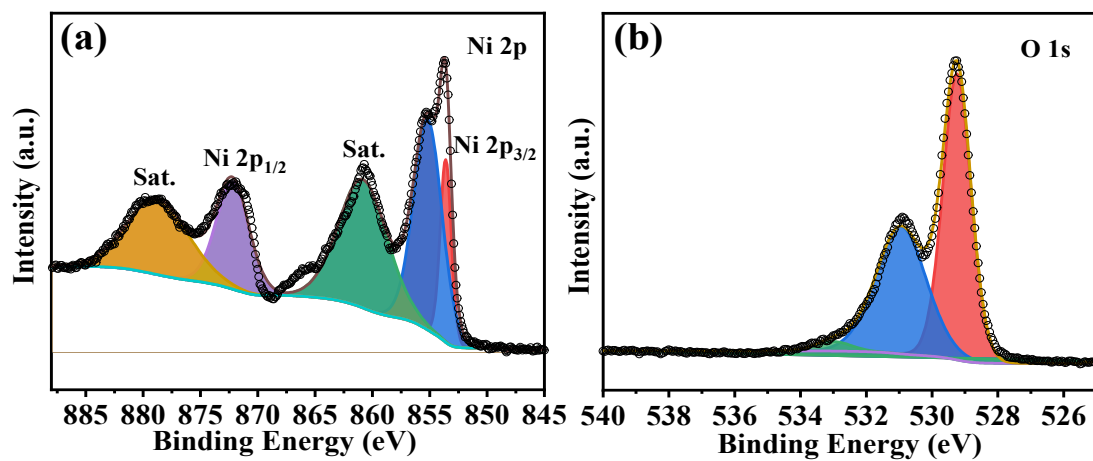

**Fig. S12.** High-resolution XPS spectra of (a) Ni 2p and (b) O 1s of NiO.

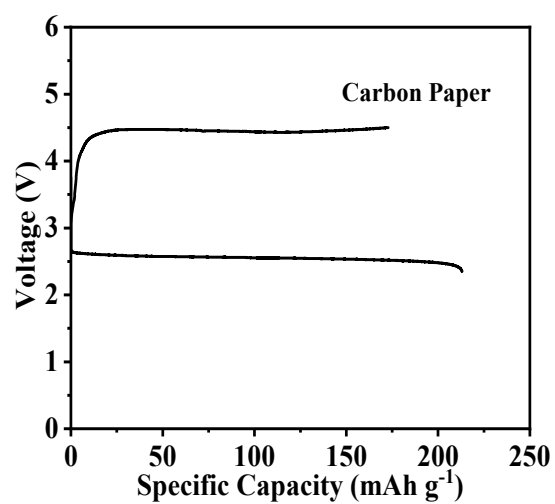

**Fig. S13.** Galvanostatic discharge-charge curve of pure carbon paper cathode at 100 mA g<sup>-1</sup>.

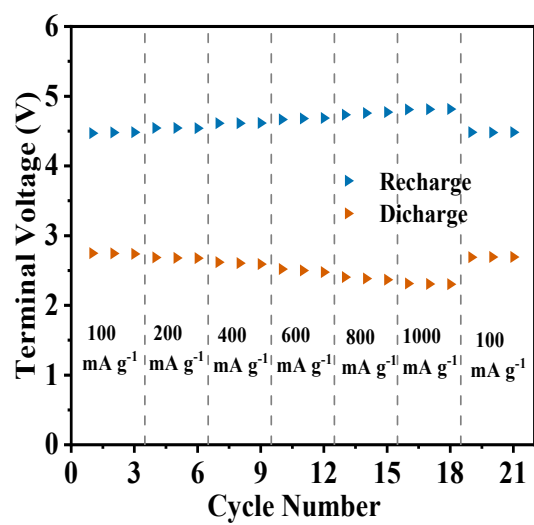

**Fig. S14.** Rate capability with terminal voltages of 2P-NiO cathode at various current densities ranging from 100 to 1000 mA g<sup>-1</sup> with the limited specific capacity of 1000 mAh g<sup>-1</sup>.

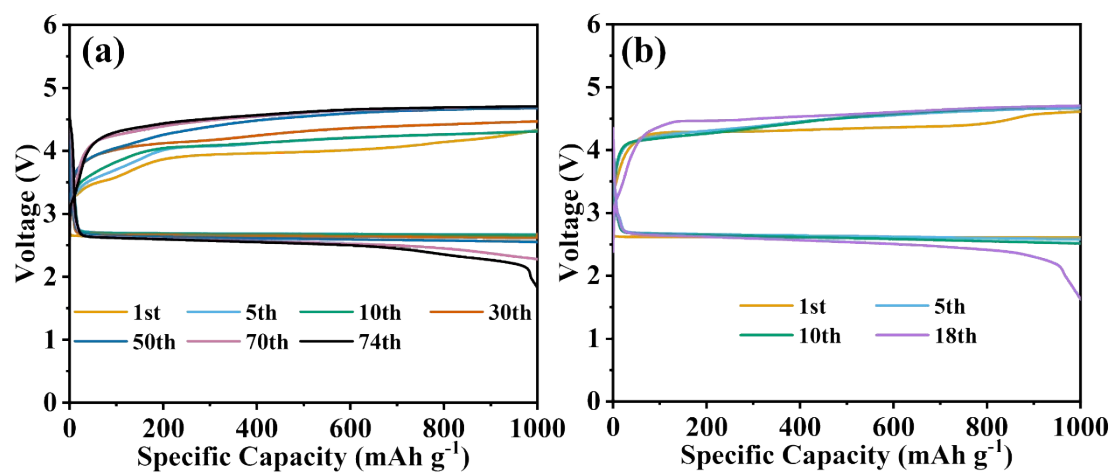

**Fig. S15.** Cycling performance of (a) NiO and (b) KB cathodes with selected typical discharge/charge profiles under a capacity limit of 1000 mAh g<sup>-1</sup> at 200 mA g<sup>-1</sup>.

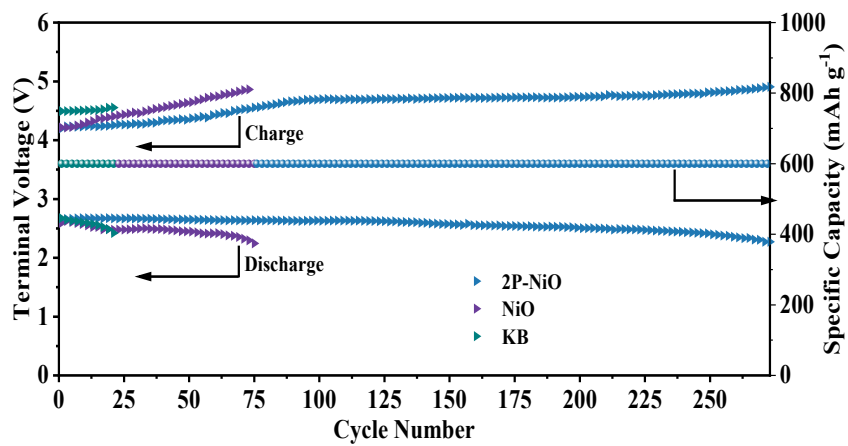

**Fig. S16.** Cycling performance of different cathodes with corresponding cycle numbers with terminal voltages under a capacity limit of 600 mAh g<sup>-1</sup> at 200 mA g<sup>-1</sup>.

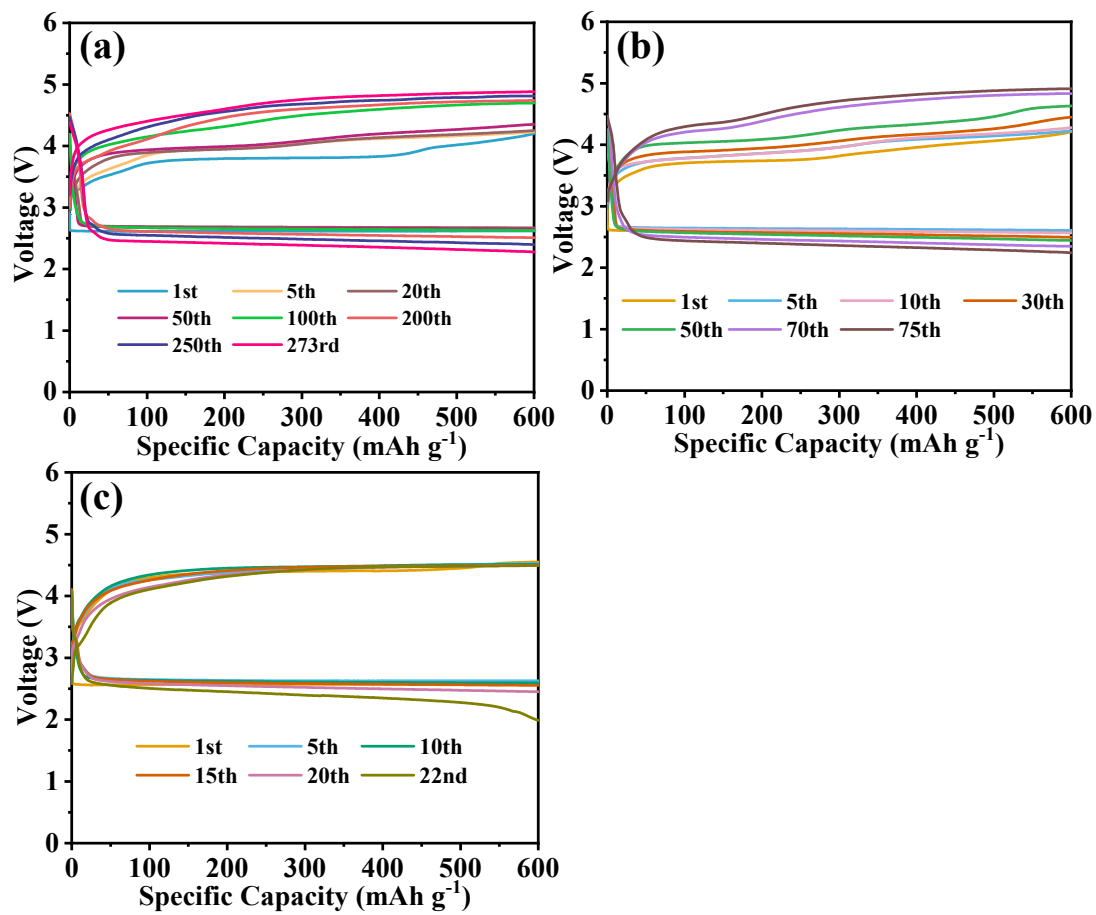

**Fig. S17.** Cycling performance of (a) 2P-NiO, (b) NiO and (c) KB cathodes with selected typical discharge/charge profiles under a capacity limit of 600 mAh g<sup>-1</sup> at 200 mA g<sup>-1</sup>.





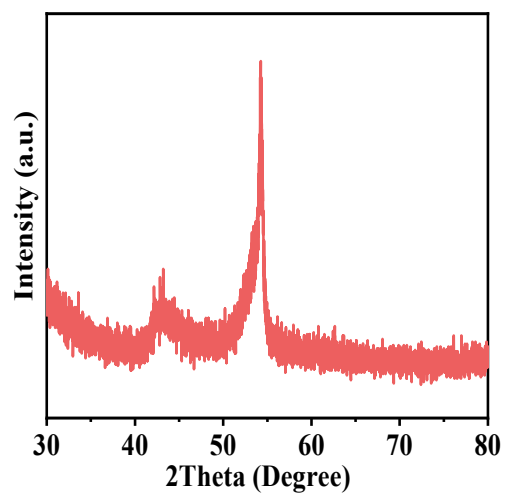

**Fig. S19.** XRD pattern of carbon

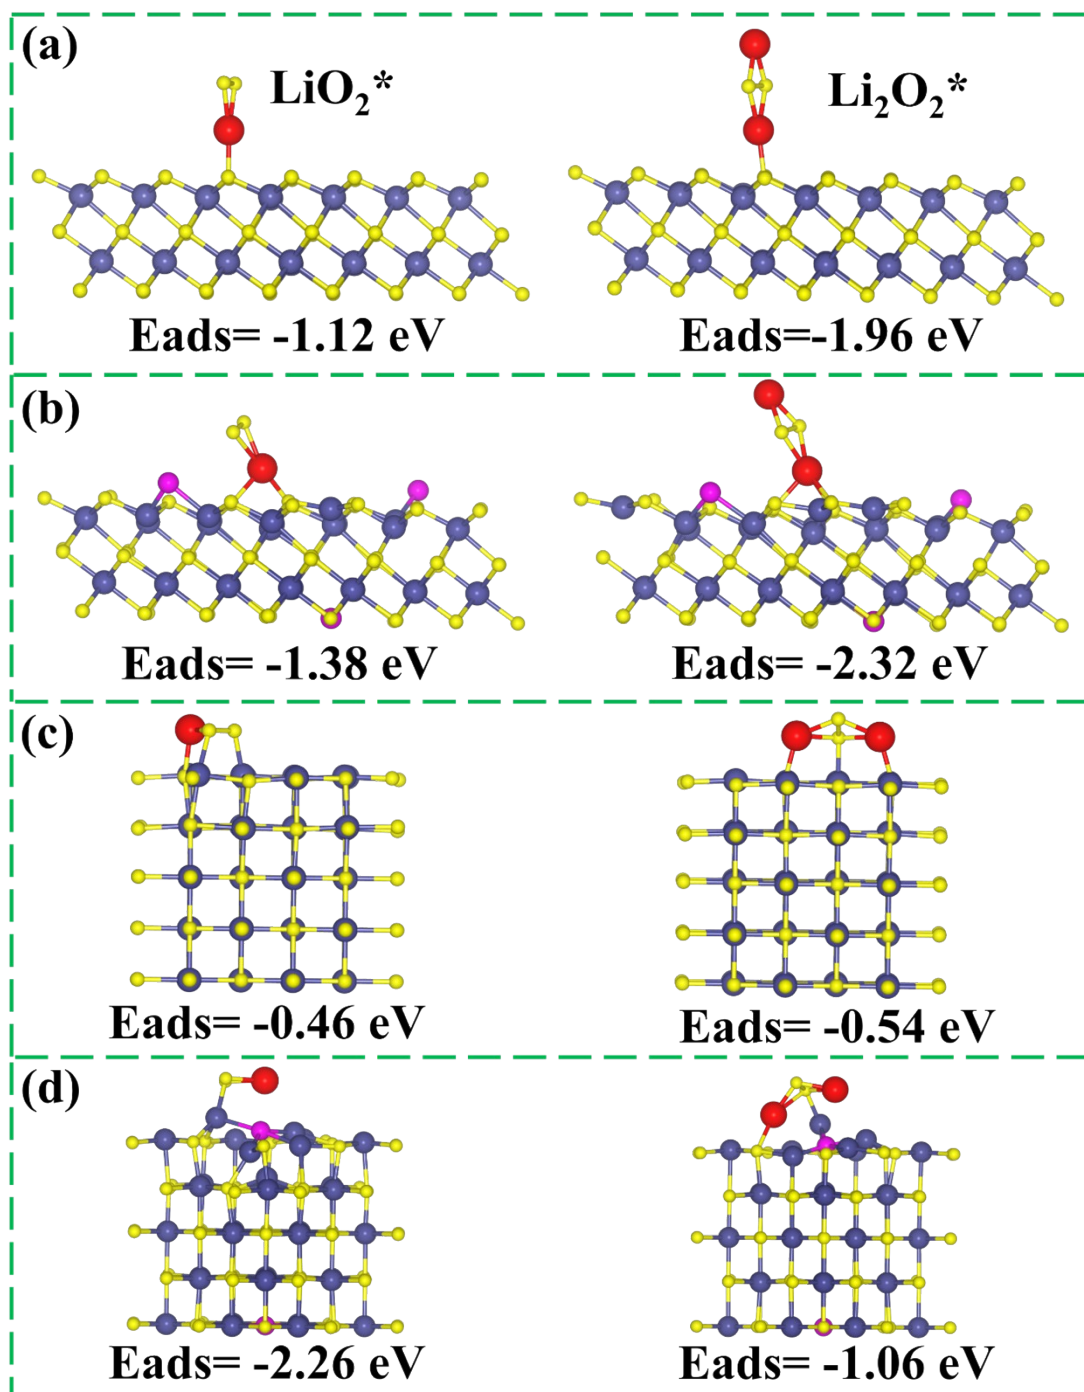

**Fig. S20.** Optimized structures and adsorption energies ( $E_{\text{ads}}$ ) of  $\text{LiO}_2$  and  $\text{Li}_2\text{O}_2$  adsorbed on the (111) and (100) surfaces for (a), (c) NiO and (b), (d) P-NiO.

**Table S7.** Bader charge analysis for LiO<sub>2</sub>/Li<sub>2</sub>O<sub>2</sub>-adsorbed NiO and P-NiO, LiO<sub>2</sub>/Li<sub>2</sub>O<sub>2</sub> adsorbed energy and distance between LiO<sub>2</sub>/Li<sub>2</sub>O<sub>2</sub> and surface of substrates.

|                    | Substrate-LiO <sub>2</sub> |       |           | Substrate-Li <sub>2</sub> O <sub>2</sub> |       |           |
|--------------------|----------------------------|-------|-----------|------------------------------------------|-------|-----------|
|                    | Q(liO <sub>2</sub> )       | R (Å) | Eads (eV) | Q(li <sub>2</sub> O <sub>2</sub> )       | R (Å) | Eads (eV) |
| <b>NiO (111)</b>   | -0.587                     | 3.199 | -1.12     | -0.801                                   | 3.696 | -1.96     |
| <b>P-NiO (111)</b> | -0.631                     | 2.510 | -1.38     | -0.832                                   | 3.098 | -2.32     |
| <b>NiO (100)</b>   | -0.205                     | 1.896 | -0.46     | -0.332                                   | 2.123 | -0.54     |
| <b>P-NiO (100)</b> | -0.198                     | 2.708 | -2.26     | -0.452                                   | 2.578 | -1.06     |

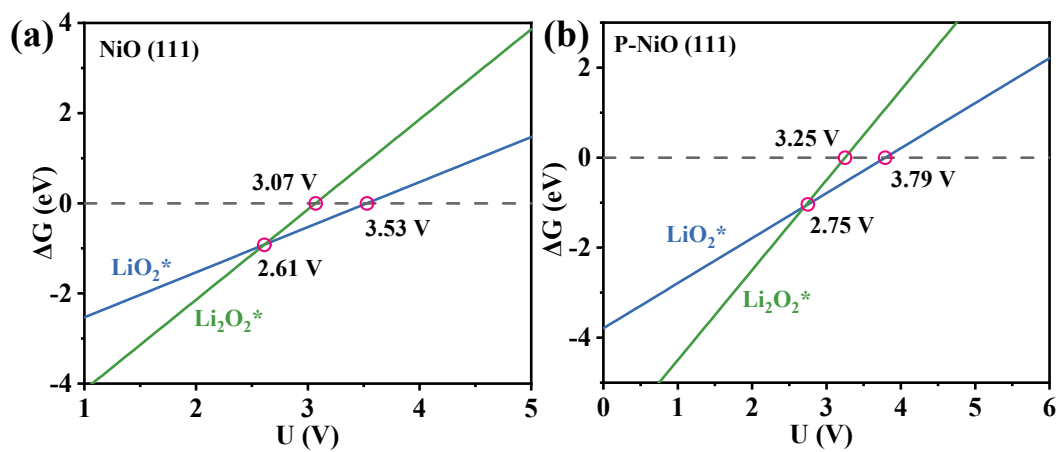

**Fig. S21.** Phase diagrams of the cathode reaction on (a) NiO and (b) P-NiO (111) planes.

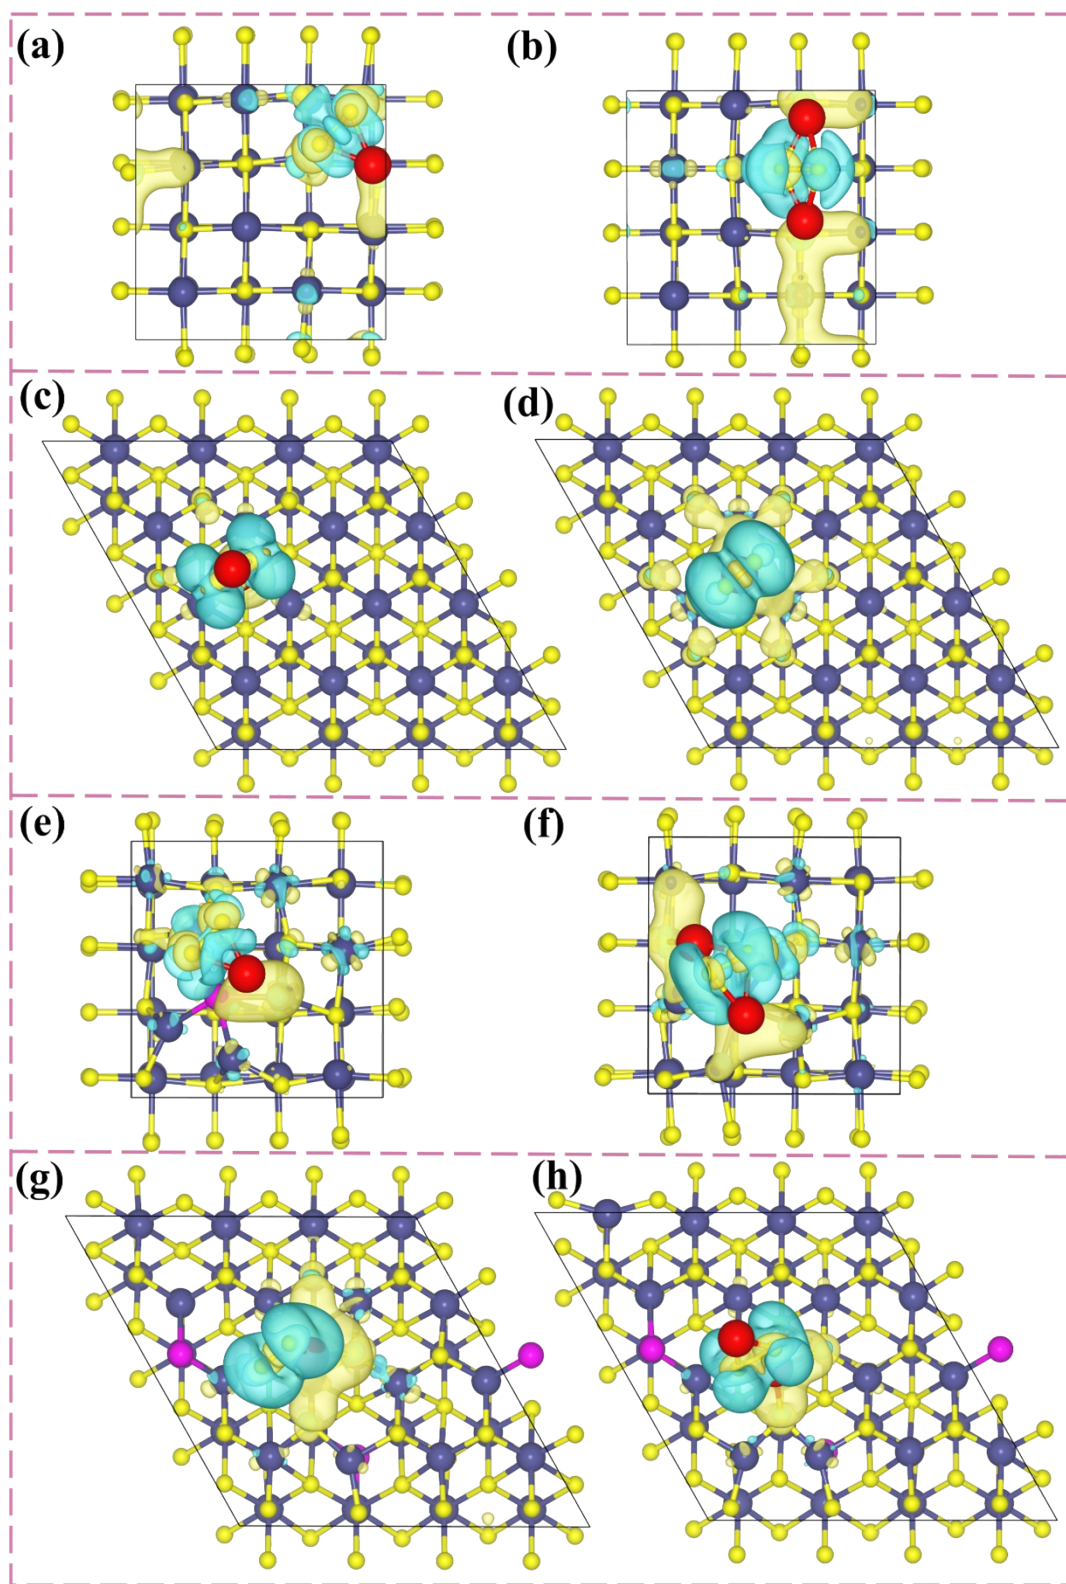

**Fig. S22.** Contour plots of the differential in charge density for the optimized structures of  $\text{Li}_2\text{O}_2$  and  $\text{Li}_2\text{O}$  molecules adsorbed on (a-b) NiO (100), (c-d) NiO (111) and (e-f) P-NiO (100), (g-h) P-NiO (111).

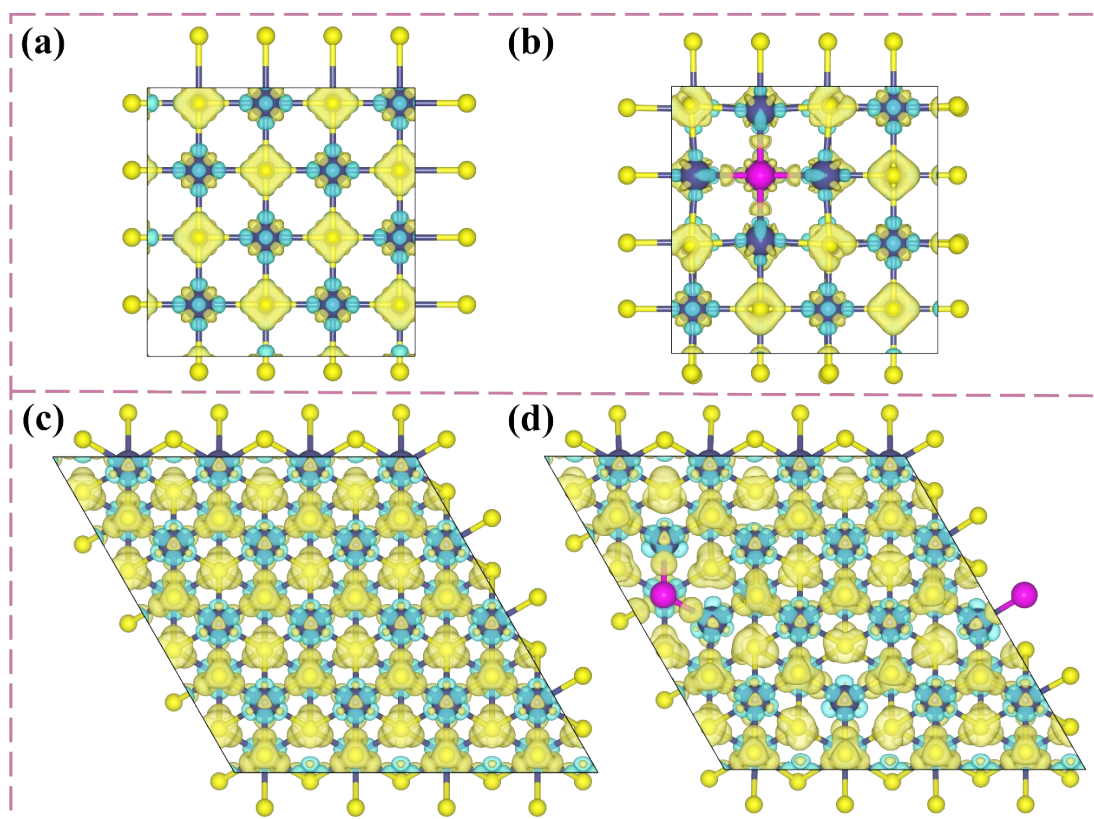

**Fig. S23.** Contour plots of the differential in charge density for (a) NiO (100), (c) NiO (111) and (b) P-NiO (100), (d) P-NiO (111).
